# Supplementary material for: Atomically dispersed Fe–Zn dual-site nanozymes with synergistic catalytic effects for the simultaneous detection of Cr(vi) and 8-hydroxyquinoline
Source: Royal Society of Chemistry journal article supplement (doi:10.1039/d3tb00266g), 2023-01-01
Supplement: d3tb00266g1.pdf [file d3tb00266g1.pdf]

## Electronic Supplementary Information

### Atomically dispersed Fe-Zn dual-site nanozymes with synergistic catalytic effects for the simultaneous detection of Cr(VI) and 8-hydroxyquinoline

Min Feng,<sup>a</sup> Xiaofang Chen,<sup>a</sup> Yuhang Liu,<sup>b</sup> Yan Zhao,<sup>a</sup> Pran Gopal Karmaker,<sup>a</sup> Jia Liu,<sup>a</sup> Ya Wang,<sup>\*a</sup> and Xiupei Yang<sup>\*a</sup>

<sup>a</sup>*College of Chemistry and Chemical Engineering, Chemical Synthesis and Pollution Control Key Laboratory of Sichuan Province, China West Normal University, Nanchong 637000, PR China.*

<sup>b</sup>*School of Chemistry and Chemical Engineering, Analytical Testing Center, Institute of Micro/Nano Intelligent Sensing, Neijiang Normal University, Neijiang 641100, PR China.*

\*Corresponding author at: College of Chemistry and Chemical Engineering, China West Normal University, Nanchong 637000, PR China.

E-mail addresses: ywang312@163.com (Y. Wang), xiupeiyang@cwnu.edu.cn (X. Yang)

**Table S1** Comparison of the kinetic parameters of different single-atom nanozymes and HRP.

| Catalyst             | Substrate                     | $V_{max}$ ( $10^{-8}$ M·s <sup>-1</sup> ) | $W$ (mg/L) | $K_m$ (mM) | Ref.      |
|----------------------|-------------------------------|-------------------------------------------|------------|------------|-----------|
| FeSNC                | TMB                           | 201                                       | 16         | 2.46       | [2]       |
|                      | H <sub>2</sub> O <sub>2</sub> | 261                                       |            | 25.44      |           |
| Fe <sub>55</sub> -NC | TMB                           | 27                                        | 1          | 0.37       | [3]       |
|                      | H <sub>2</sub> O <sub>2</sub> | 23                                        |            | 4.90       |           |
| BiSA@Au-200          | TMB                           | 92                                        | 33.3       | 1.54       | [4]       |
|                      | H <sub>2</sub> O <sub>2</sub> | 79.6                                      |            | 59.6       |           |
| Fe-NC-800NTs         | TMB                           | 65                                        | 5          | 0.08       | [5]       |
|                      | H <sub>2</sub> O <sub>2</sub> | 15.7                                      |            | 2.47       |           |
| HRP                  | TMB                           | 10                                        | 0.001      | 0.43       | [6]       |
|                      | H <sub>2</sub> O <sub>2</sub> | 8.71                                      |            | 3.70       |           |
| FeZn-NC              | TMB                           | 3.1                                       | 3.25       | 0.05       | This work |
|                      | H <sub>2</sub> O <sub>2</sub> | 2.5                                       |            | 0.07       |           |
| MWCN/FeZn-NC         | TMB                           | 4.3                                       | 3.25       | 0.04       | This work |
|                      | H <sub>2</sub> O <sub>2</sub> | 6.9                                       |            | 1.34       |           |

**Table S2** Comparison of the proposed method with other methods for the detection of Cr(VI).

| No. | Method       | Materials                                             | Linear Rang ( $\mu\text{M}$ ) | LOD ( $\mu\text{M}$ ) | Ref.      |
|-----|--------------|-------------------------------------------------------|-------------------------------|-----------------------|-----------|
| 1   | Colorimetry  | PNPG-PEG                                              | 0.01-12.5                     | 0.012                 | [7]       |
| 2   | Colorimetry  | GO                                                    | 0.07-0.43                     | 0.0058                | [8]       |
| 3   | Colorimetry  | AuNR@Ag                                               | 5-35                          | 1                     | [9]       |
| 4   | Colorimetry  | CeO <sub>2</sub> NRs-MOF                              | 0.03-5                        | 0.02                  | [10]      |
| 5   | Colorimetry  | CoFe <sub>2</sub> O <sub>4</sub> /H <sub>2</sub> PPOP | 0.6-100                       | 0.026                 | [11]      |
| 6   | Fluorescence | NH <sub>2</sub> -CuMOFs                               | 0.1-20                        | 0.018                 | [12]      |
| 7   | Fluorescence | CQDS                                                  | 1.5-30                        | 0.023                 | [13]      |
| 8   | Fluorescence | GCPF                                                  | 0-50                          | 0.22                  | [14]      |
| 9   | Colorimetry  | FeZn-NC                                               | 1-10                          | 0.56                  | This work |
| 10  | Colorimetry  | MWCN/FeZn-NC                                          | 0.1-15                        | 0.040                 | This work |

**Table S3** Comparison of the proposed method with other methods for the detection of 8-HQ.

| No. | Method          | Materials    | Linear Rang ( $\mu\text{M}$ ) | LOD ( $\mu\text{M}$ ) | Ref.      |
|-----|-----------------|--------------|-------------------------------|-----------------------|-----------|
| 1   | Electrochemical | CoPc-SPCE    | 10-250                        | 0.89                  | [15]      |
| 2   | Electrochemical | ANSA-GC      | 0.5-425                       | 0.16                  | [16]      |
| 3   | Electrochemical | SLSMCNTPE    | 0.2-1000                      | 0.11                  | [17]      |
| 4   | Colorimetry     | FeZn-NC      | 0.4-50                        | 0.18                  | This work |
| 5   | Colorimetry     | MWCN/FeZn-NC | 0.15-50                       | 0.055                 | This work |

**Table S4** Analytical results of the 8-HQ determination in samples.

| Sample      | Initial ( $\mu\text{M}$ ) | Added ( $\mu\text{M}$ ) | Found ( $\mu\text{M}$ ) | Recovery (%) | RSD (% , n=5) |
|-------------|---------------------------|-------------------------|-------------------------|--------------|---------------|
| Hair oil    | -                         | 5.0                     | $5.27 \pm 0.12$         | 105.4        | 2.4           |
|             |                           | 25.0                    | $26.43 \pm 0.36$        | 105.7        | 1.4           |
|             |                           | 45.0                    | $46.13 \pm 0.28$        | 102.5        | 0.6           |
| Conditioner | -                         | 5.0                     | $4.86 \pm 0.10$         | 97.2         | 2.0           |
|             |                           | 25.0                    | $25.78 \pm 0.37$        | 103.1        | 1.4           |
|             |                           | 45                      | $45.59 \pm 0.14$        | 101.3        | 0.3           |

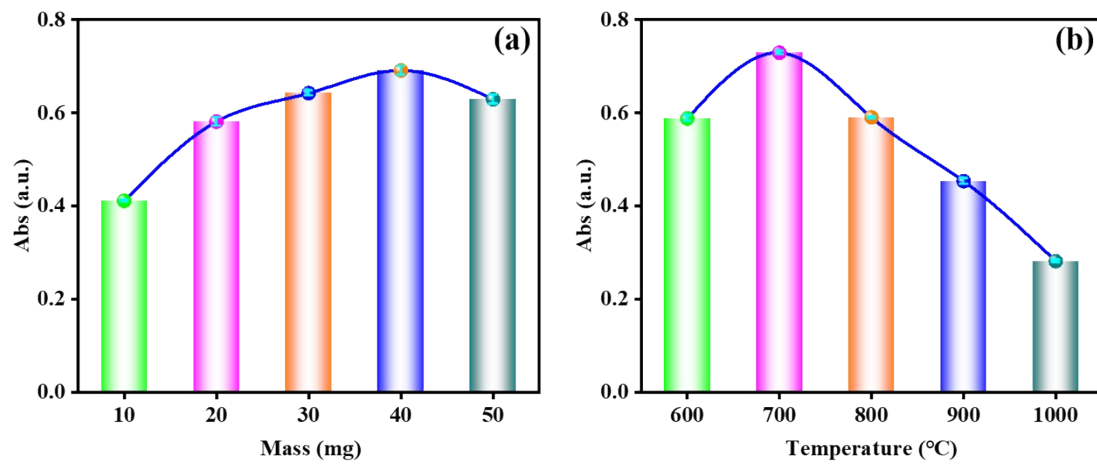

**Fig. S1** Effect of MWCN (a) and temperature (b) on the catalytic activity of MWCN/FeZn-NC.

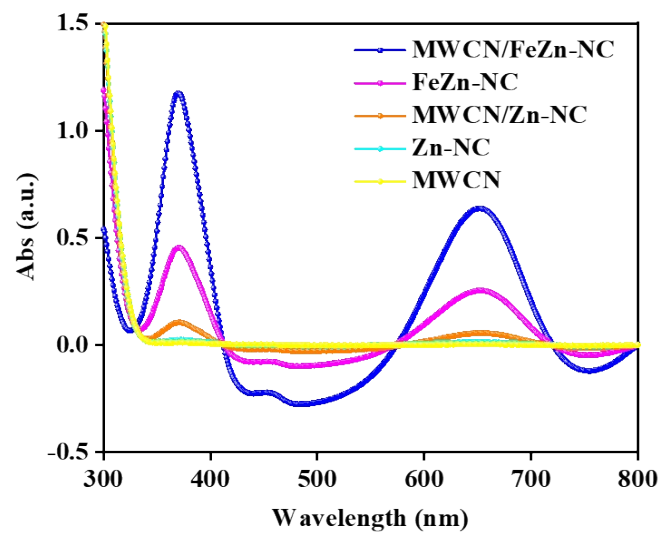

Fig. S2 UV-vis spectra of different materials in the  $H_2O_2/TMB$  solution.

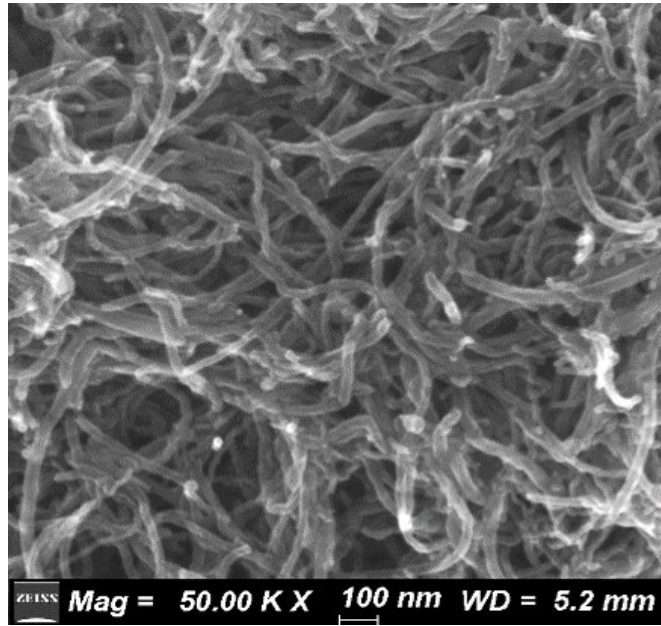

Fig. S3 SEM images of the MWCN.



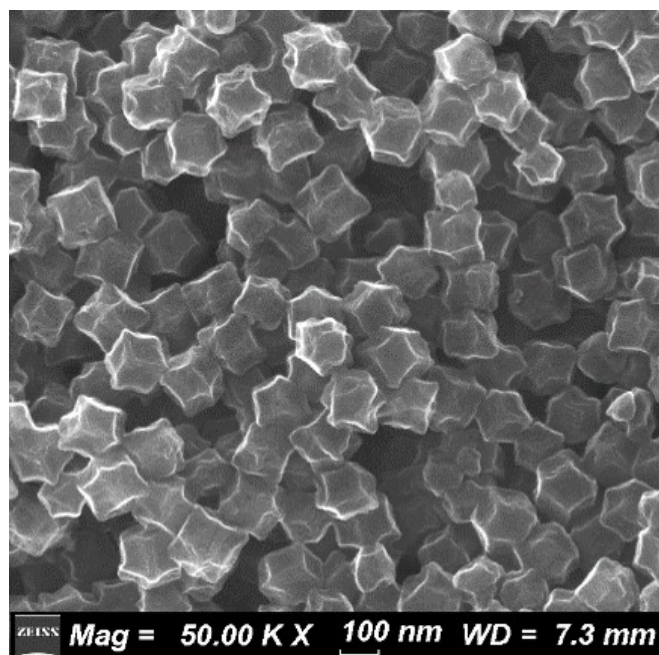

Fig. S4 SEM images of the FeZn-NC.

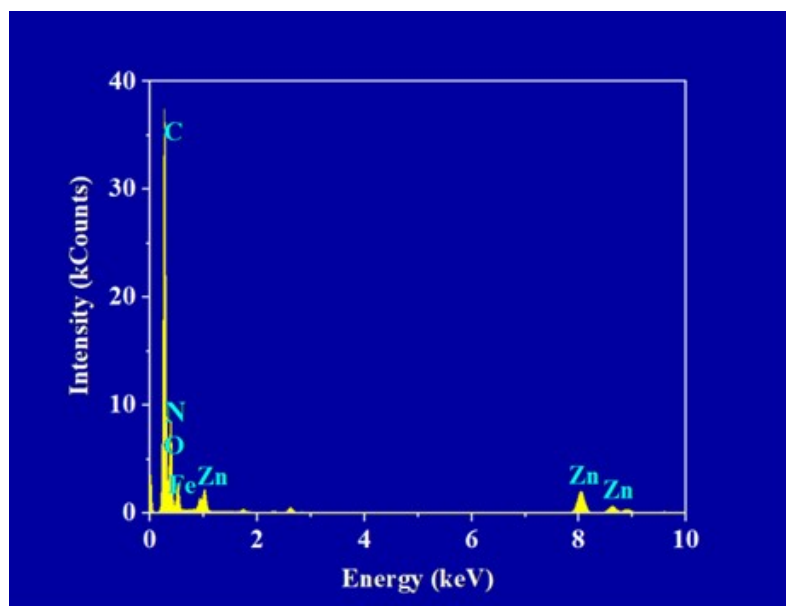

Fig. S5 EDS images of the MWCN/FeZn-NC.

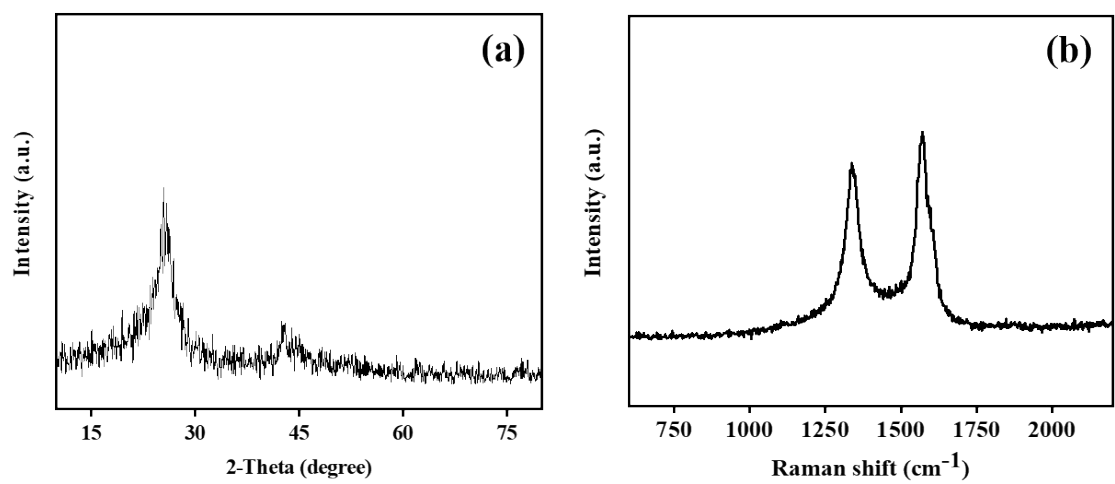

Fig. S6 XRD (a) and Raman (b) images of the MWCN/FeZn-NC.

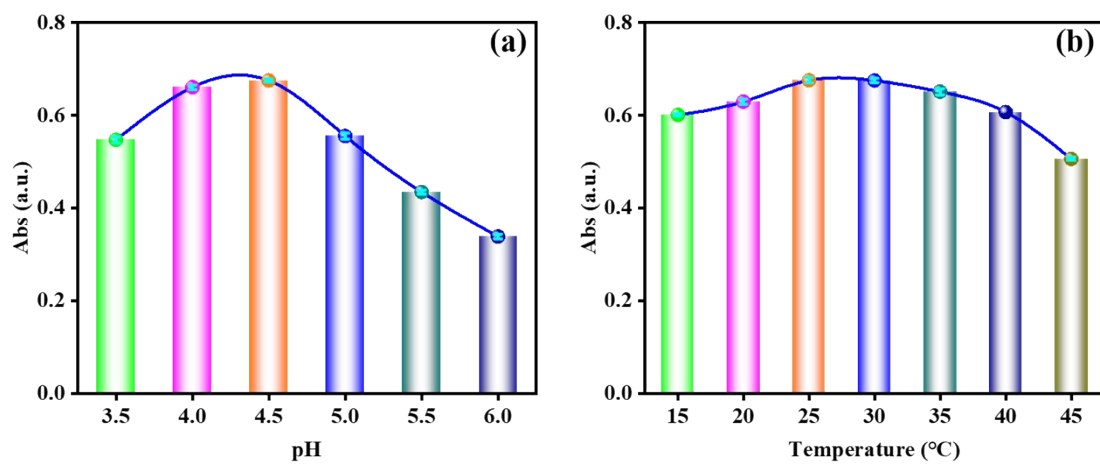

Fig. S7 Effect of pH (a) and temperature (b) on the catalytic activity of MWCN/FeZn-NC.

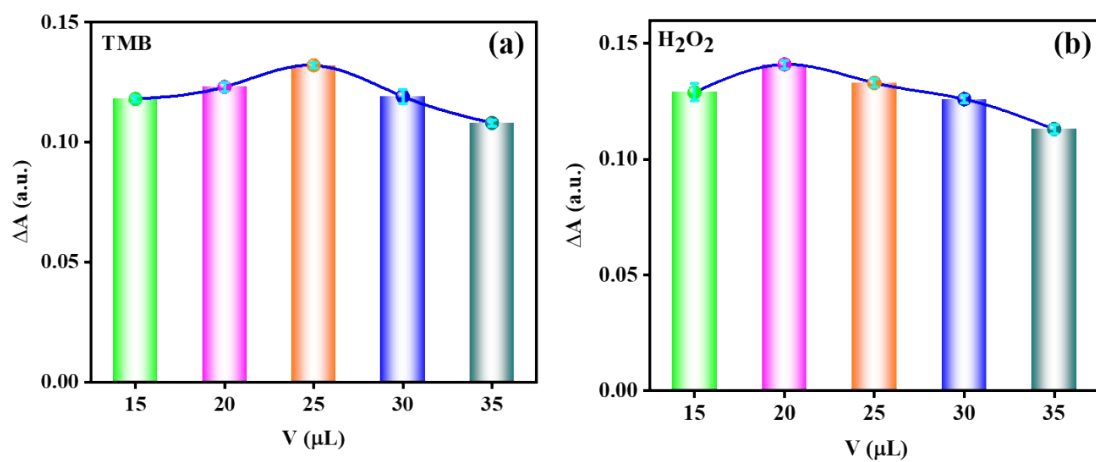

Fig. S8 Effect of the amount of TMB (a) and H<sub>2</sub>O<sub>2</sub> (b) on the detection of Cr(VI).

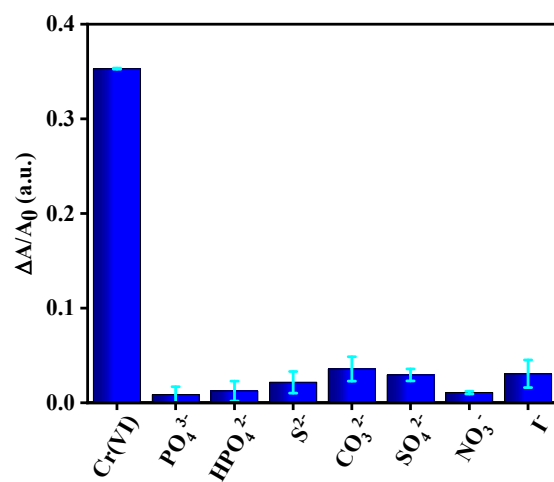

Fig. S9 Effect of anions on the chromogenic system of Cr(VI).

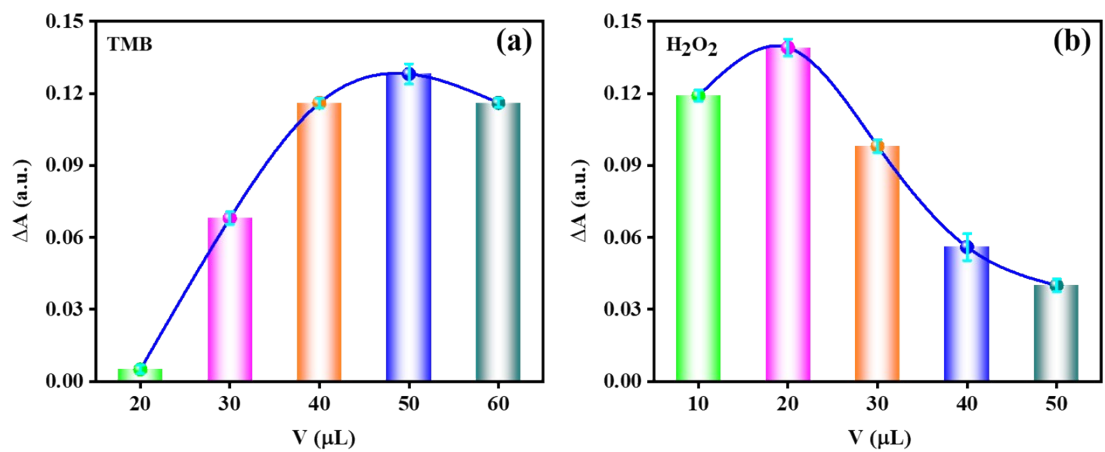

**Fig. S10** Effect of the amount of TMB (a) and H<sub>2</sub>O<sub>2</sub> (b) on the detection of 8-HQ.

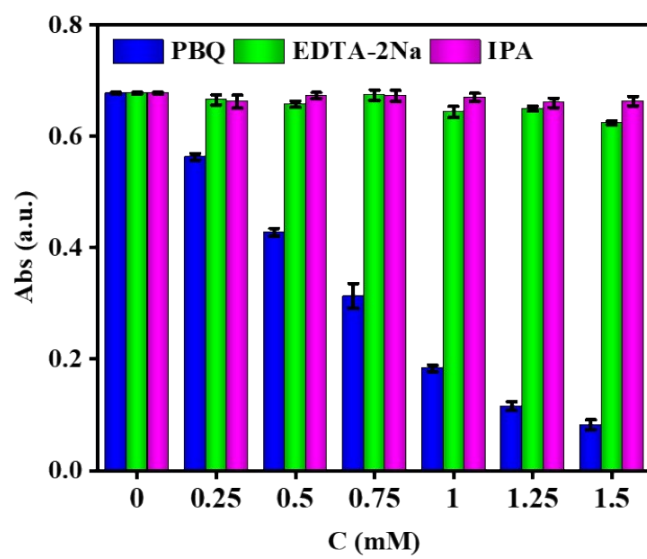

**Fig. S11** Relationship between the Abs and different concentration of free radical scavengers.



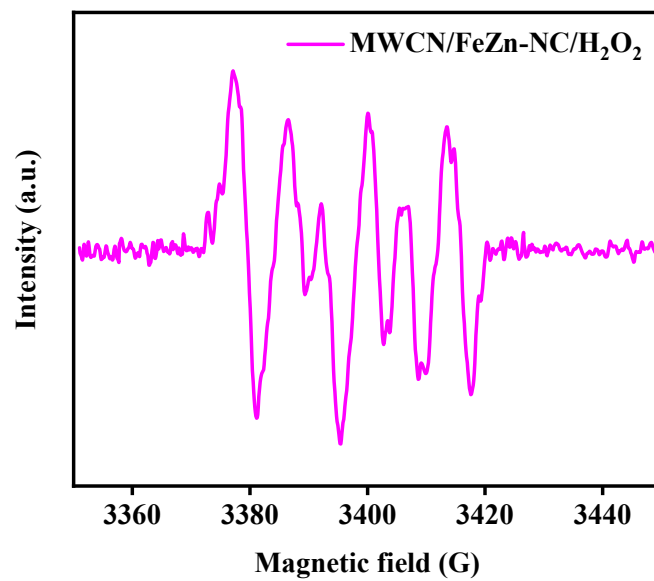

**Fig. S12** ESR spectra of the DMPO/ $\cdot$ O<sub>2</sub><sup>-</sup> spin adduct of MWCN/FeZn-NC/H<sub>2</sub>O<sub>2</sub>.

## References

- (1) Ghayyem, S., Swaidan, A., Barras, A., Dolci, M., Faridbod, F., Szunerits, S., Boukherroub, R., 2021. Colorimetric detection of chromium (VI) ion using poly(N-phenylglycine) nanoparticles acting as a peroxidase mimetic catalyst. *Talanta*. 226, 122082. <https://doi.org/10.1016/j.talanta.2021.122082>.
- (2) Jiao, L., Kang, Y., Chen, Y., Wu, N., Wu, Y., Xu, W., Wei, X., Wang, H., Gu, W., Zheng, L., Song, W., Zhu, C., 2021. Unsymmetrically coordinated single Fe-N<sub>3</sub>S<sub>1</sub> sites mimic the function of peroxidase. *Nano Today*. 40, 101261. <https://doi.org/10.1016/j.nantod.2021.101261>.
- (3) Kim, D., Choi, E., Lee, C., Choi, Y., Kim, H., Yu, T., Piao, Y., 2019. Highly sensitive and selective visual detection of Cr(VI) ions based on etching of silver-coated gold nanorods. *Nano. Converg.* 6, 34. <https://doi.org/10.1186/s40580-019-0206-1>.
- (4) Liu, W., Chu, L., Zhang, C., Ni, P., Jiang, Y., Wang, B., Lu, Y., Chen, C., 2021. Hemin-assisted synthesis of peroxidase-like Fe-N-C nanozymes for detection of ascorbic acid-generating bio-enzymes. *Chem. Eng. J.* 415, 128876. <https://doi.org/10.1016/j.cej.2021.128876>.
- (5) Nghia, N.N., Huy, B.T., Lee, Y.I., 2018. Colorimetric detection of chromium(VI) using graphene oxide nanoparticles acting as a peroxidase mimetic catalyst and 8-hydroxyquinoline as an inhibitor. *Microchim. Acta*. 186, 36. <https://doi.org/10.1007/s00604-018-3169-8>.
- (6) Qiu, L., Ma, Z., Li, P., Hu, X., Chen, C., Zhu, X., Liu, M., Zhang, Y., Li, H., Yao, S., 2021. Sensitive and selective detection of chromium (VI) based on two-dimensional luminescence metal organic framework nanosheets via the mechanism integrating chemical oxidation-reduction and inner filter effect. *J. Hazard. Mater.* 419, 126443. <https://doi.org/10.1016/j.jhazmat.2021.126443>.
- (7) Song, J., Zhou, H., Gao, R., Zhang, Y., Zhang, H., Zhang, Y., Wang, G., Wong, P.K., Zhao, H., 2018. Selective determination of Cr(VI) by glutaraldehyde cross-linked chitosan polymer fluorophores. *ACS Sens.* 3, 792-798. <https://doi.org/10.1021/acssensors.8b00038>.
- (8) Song, N., Zhong, M., Xu, J., Wang, C., Lu, X., 2022. Single-atom iron confined within polypyrrole-derived carbon nanotubes with exceptional peroxidase-like activity for total antioxidant capacity. *Sens. Actuat. B: Chem.* 351, 130969. <https://doi.org/10.1016/j.snb.2021.130969>.
- (9) Wang, X., Zhao, M., Song, Y., Liu, Q., Zhang, Y., Zhuang, Y., Chen, S., 2019. Synthesis of ZnFe<sub>2</sub>O<sub>4</sub>/ZnO heterostructures decorated three-dimensional graphene foam as peroxidase mimetics for colorimetric assay of hydroquinone. *Sens. Actuat. B: Chem.* 283, 130-137. <https://doi.org/10.1016/j.snb.2018.11.079>.
- (10) Yan, H., Jiao, L., Wang, H., Zhu, Y., Chen, Y., Shuai, L., Gu, M., Qiu, M., Gu, W., Zhu, C., 2021. Single-atom Bi-anchored Au hydrogels with specifically boosted peroxidase-like activity for cascade catalysis and sensing. *Sens. Actuat. B: Chem.* 343, 130108. <https://doi.org/10.1016/j.snb.2021.130108>.
- (11) Yuan, H., Peng, J., Ren, T., Luo, Q., Luo, Y., Zhang, N., Huang, Y., Guo, X., Wu, Y., 2021. Novel fluorescent lignin-based hydrogel with cellulose nanofibers and carbon dots for highly efficient adsorption and detection of Cr(VI). *Sci. Total. Environ.* 760, 143395. <https://doi.org/10.1016/j.scitotenv.2020.143395>.
